# Supplementary material for: Manganese oxide-based mesoporous thin-film electrodes: manganese disproportionation reaction in alkaline media
Source: Royal Society of Chemistry journal article supplement (doi:10.1039/d3ta07973b), 2024-01-01
Supplement: d3ta07973b1.pdf [file d3ta07973b1.pdf]

## Electronic Supporting Information

### Manganese Oxide-based Mesoporous Thin-Film Electrodes: Manganese Disproportionation Reaction in Alkaline Media\*\*

*Irmak Karakaya Durukan<sup>a</sup>, Işıl Ulu<sup>a</sup> and Ömer Dag<sup>\*ab</sup>*

<sup>a</sup>Department of Chemistry, Bilkent University, 06800, Ankara, Türkiye.

<sup>b</sup>UNAM — National Nanotechnology Research Center and Institute of Materials Science and Nanotechnology, Bilkent University, 06800, Ankara, Türkiye.

**\*\* Dedicated to Prof. Geoffrey A. Ozin's 80<sup>th</sup> Birthday**

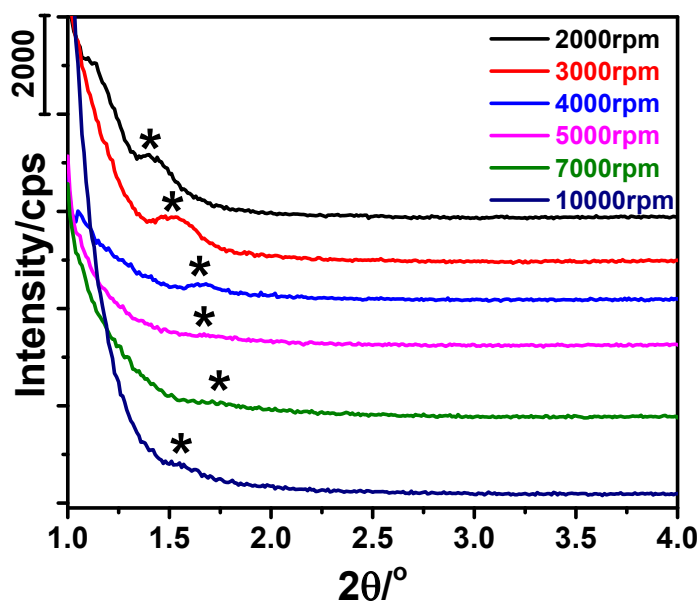

**Fig. S1.** Small-angle XRD patterns of the  $\text{LiNO}_3\text{-Mn}(\text{NO}_3)_2\text{-P123}$  LLC films after coating of liquid precursor at indicated spin rates.

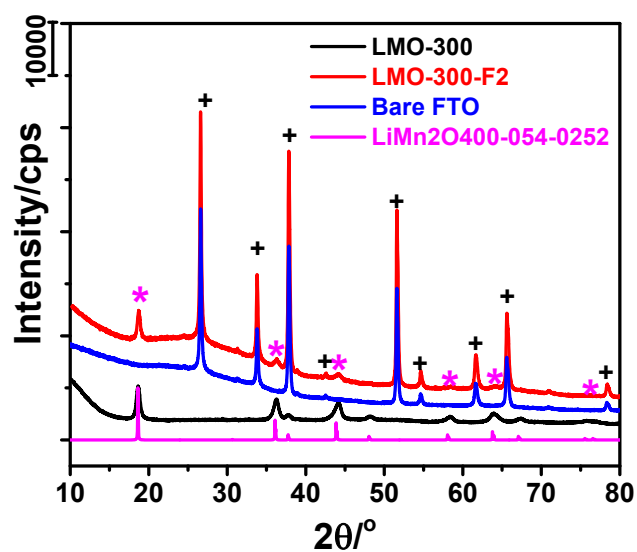

**Fig. S2.** The wide-angle XRD patterns of the *m*-LMO-300 powder and *m*-LMO-300-F2 film samples. + assigned to SnO<sub>2</sub> using its reference diffraction pattern (ICDD card no. 00-041-1445) and \* to LiMn<sub>2</sub>O<sub>4</sub> lines using the ICDD card no. 00-054-0252.

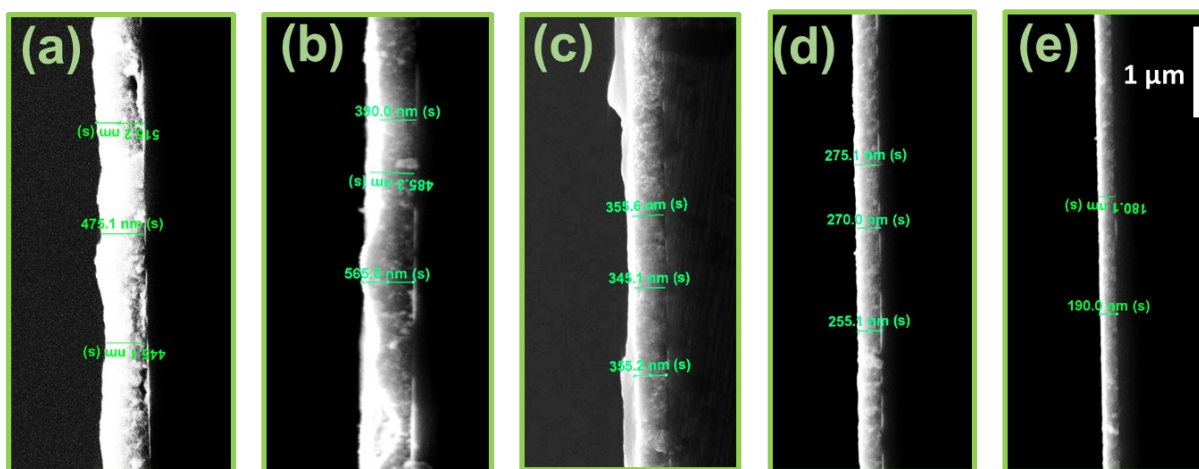

**Fig. S3.** Cross sectional SEM images of the *m*-LMO thin films, coated at (a) 2000, (b) 3000, (c) 5000, (d) 7000, and (e) 10000 rpm spin rates.

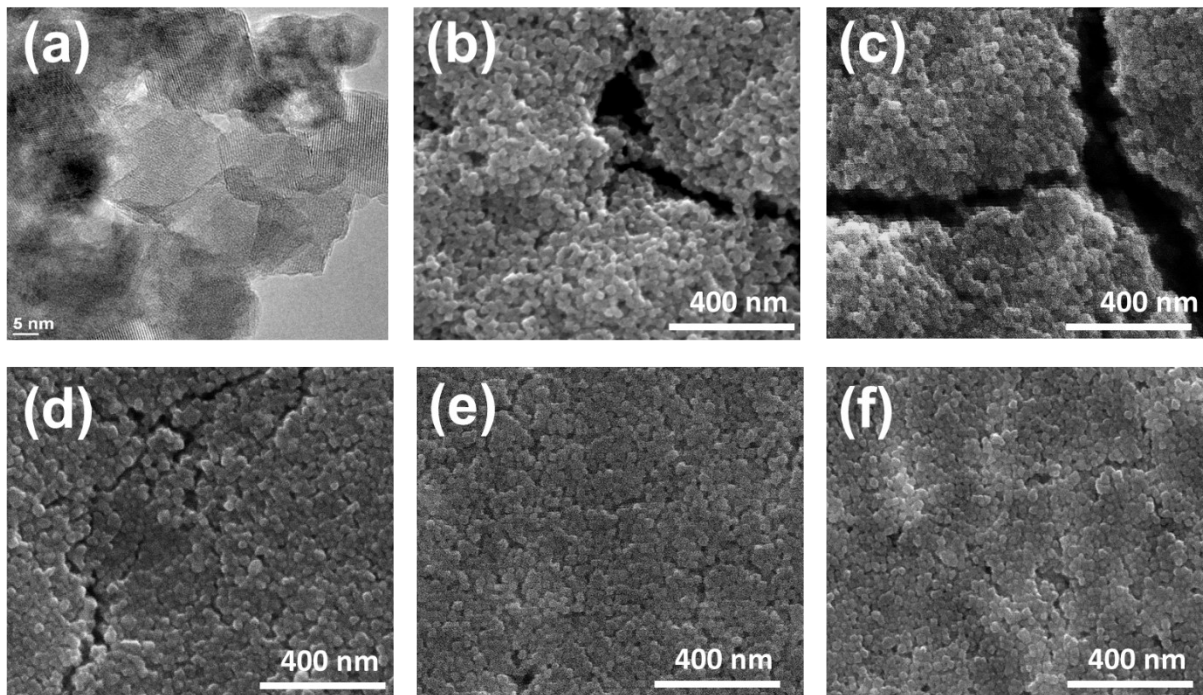

**Fig. S4.** The TEM (a) and SEM (b) images of the *m*-LMO-300-F2 sample and the SEM images of the *m*-LMO-300-F#, where # is (c) 3000, (d) 5000, (e) 7000, and (f) 10000.

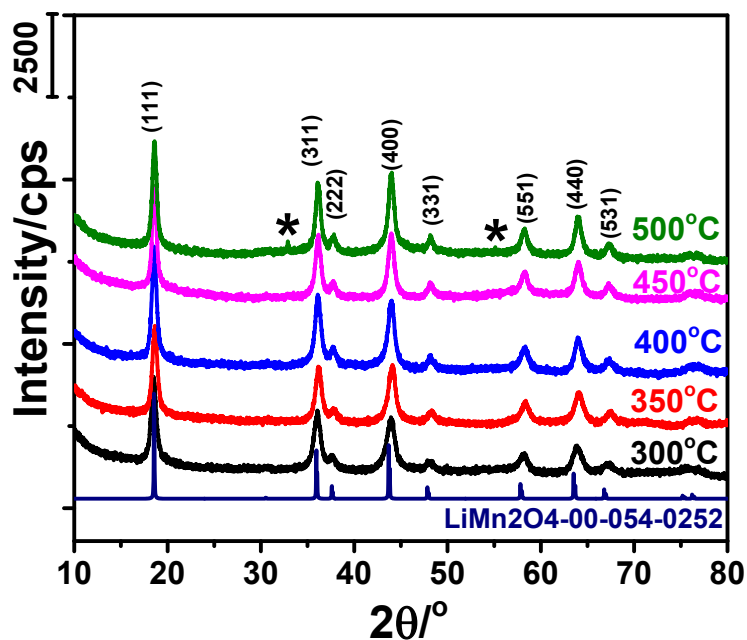

**Fig. S5.** The powder XRD patterns of the annealed *m*-LMO thick films synthesized by drop casting method, calcined and annealed at indicated temperatures together with the reference pattern of  $\text{LiMn}_2\text{O}_4$  from ICDD card no. 00-054-0252. The lines marked \* are assigned to  $\text{Mn}_2\text{O}_3$  using the ICDD card no. 00-041-1442.

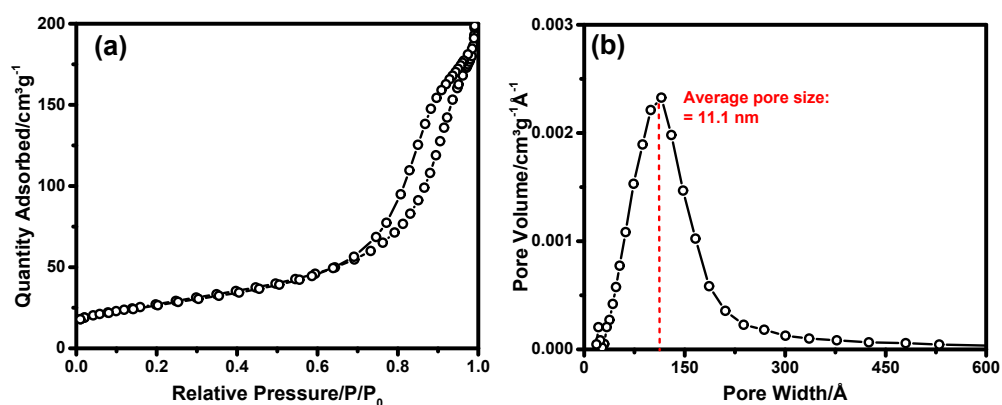

Fig. S6. (a)  $N_2$  (77 K) adsorption-desorption isotherm and (b) BJH pore-size distribution

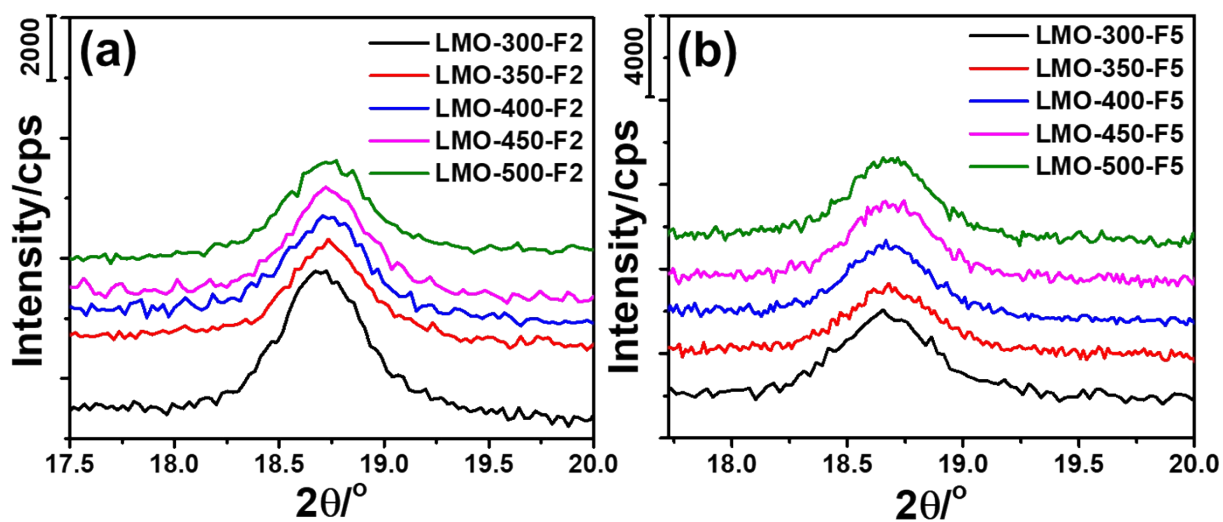

curve of m-LMO-300.

Fig. S7. The XRD patterns between 17.5 and 20.0°,  $2\theta$ , of (a) *m*-LMO-X-F2 (b) *m*-LMO-X-F5 (where X is given in the panels).

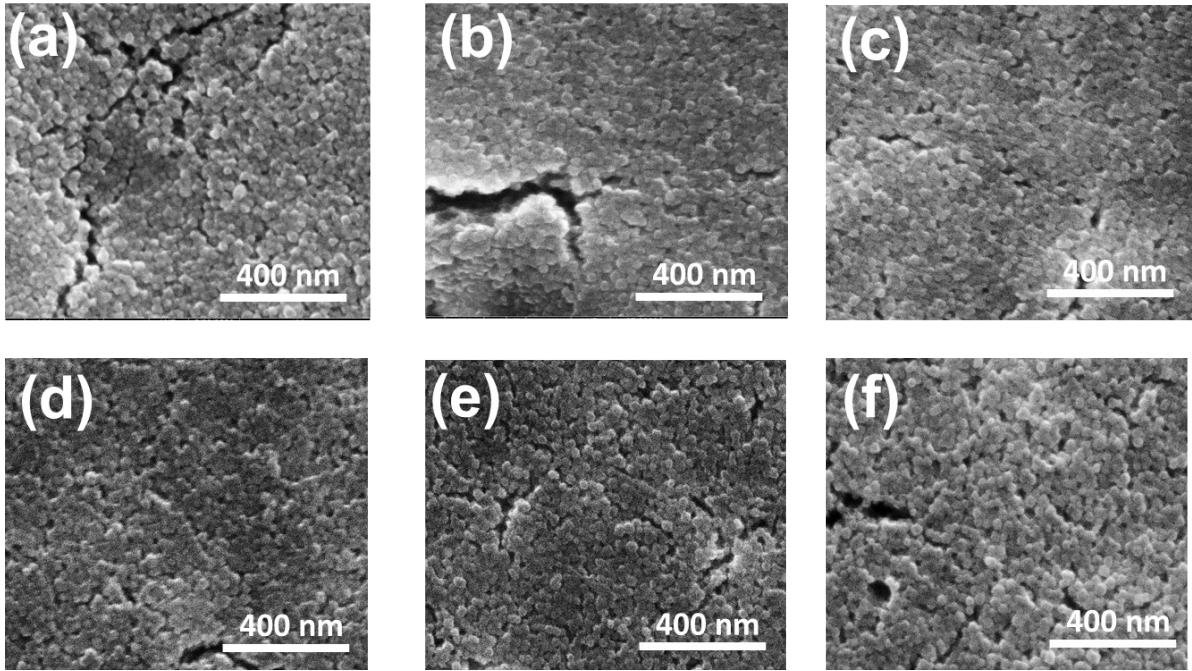

**Fig. S8.** The SEM images of the *m*-LMO-*X*-F5 thin films, where *X* is (a) 300, (b) 350, (c) 400, (d) 450, (e) 500, and (f) 600.

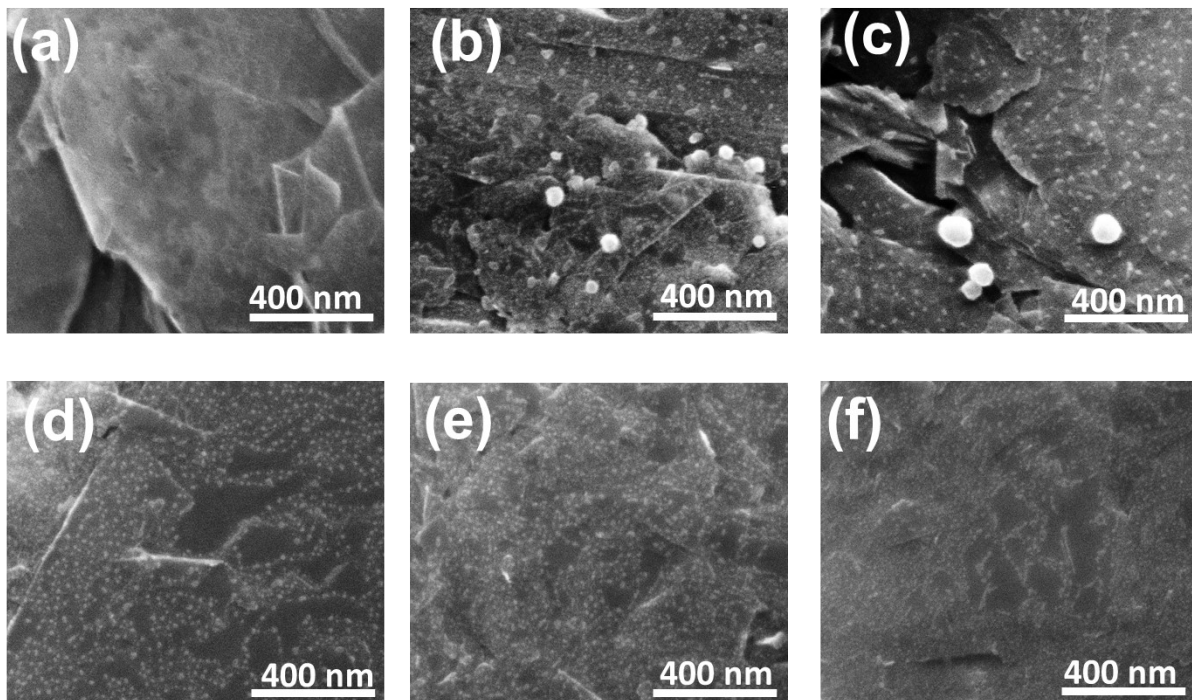

**Fig. S9.** The SEM images of the (a) bare graphite and *m*-LMO-300-G# thin films, where # is, (b) 5, (c) 10, (d) 20, (e) 50, (f) 100.

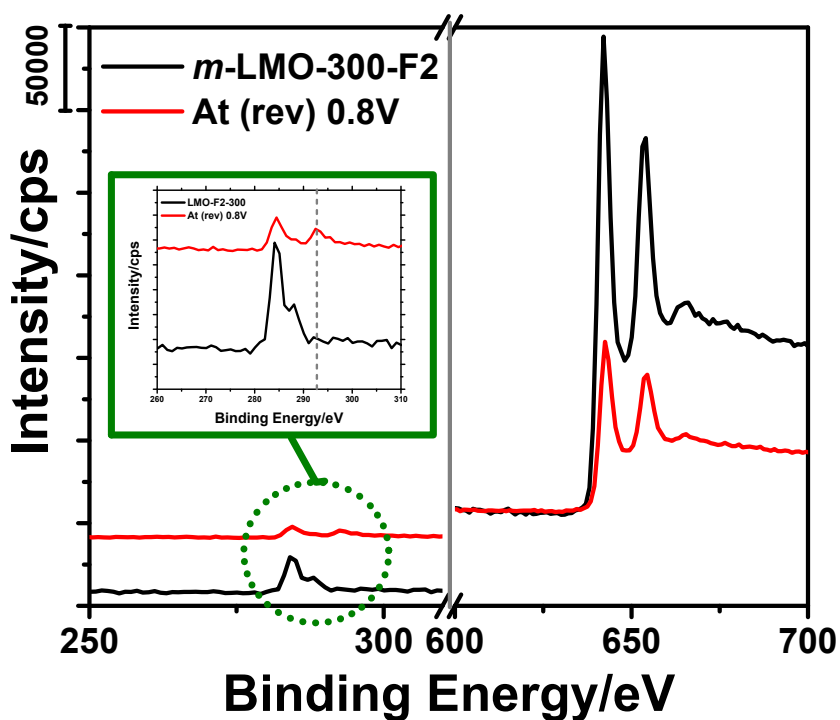

**Fig. S10.** The XPS survey spectra of the *m*-LMO-300-F2 and *m*-LMO-300-F2 electrodes at (rev) 0.8 V in the 3<sup>rd</sup> CV curve in 1.0 M KNO<sub>3</sub>. Inset graph: magnified XPS spectra of K 2p

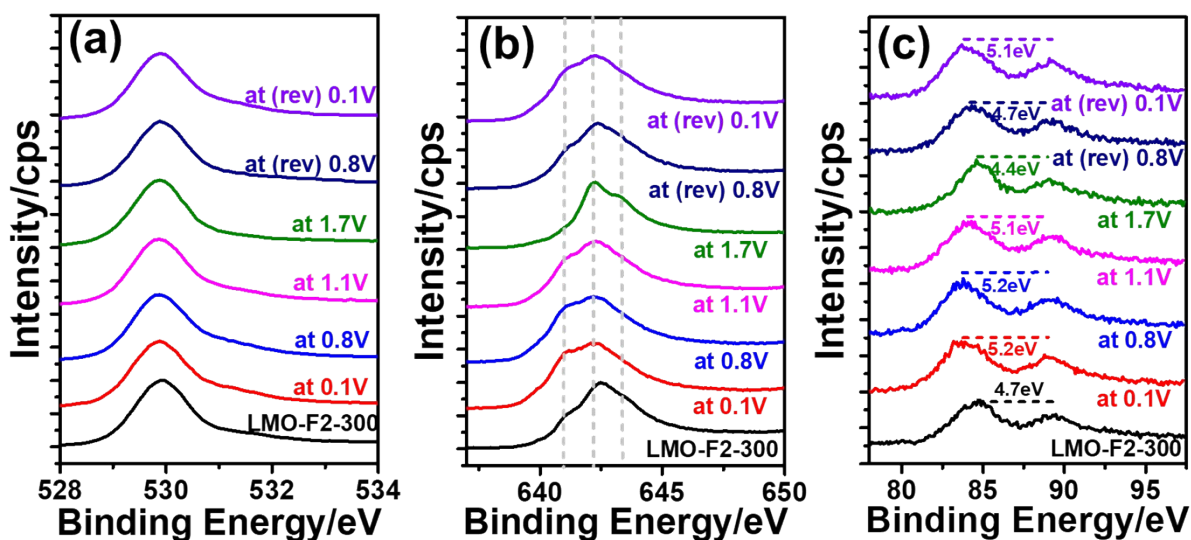

region.

**Fig. S11.** The XPS spectra of the *m*-LMO-300-F2 electrodes at various potentials (between -0.1 and 1.9 V vs RHE) in 1.0 M LiNO<sub>3</sub> in the 1<sup>st</sup> CV curve in the regions of (a) O 1s, (b) Mn 2p (<sup>2</sup>P<sub>3/2</sub>), and (c) Mn 3s.



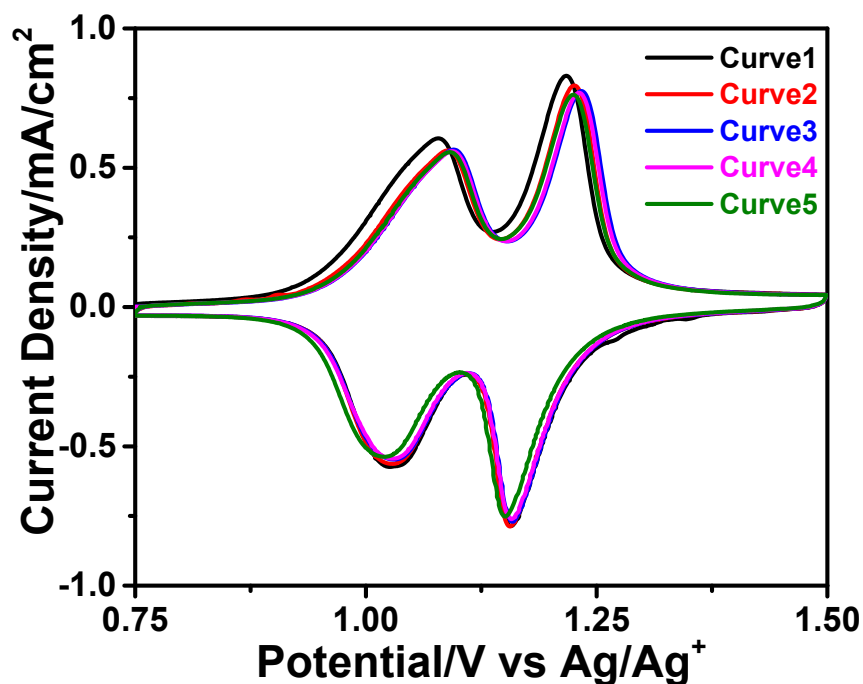

**Fig. S12.** The CV curves of the *m*-LMO-300-F2 electrode in 1.0 M LiClO<sub>4</sub> acetonitrile solution with 5 mV/s in a potential window of 0.75 and 1.5 V vs Ag/Ag<sup>+</sup>.

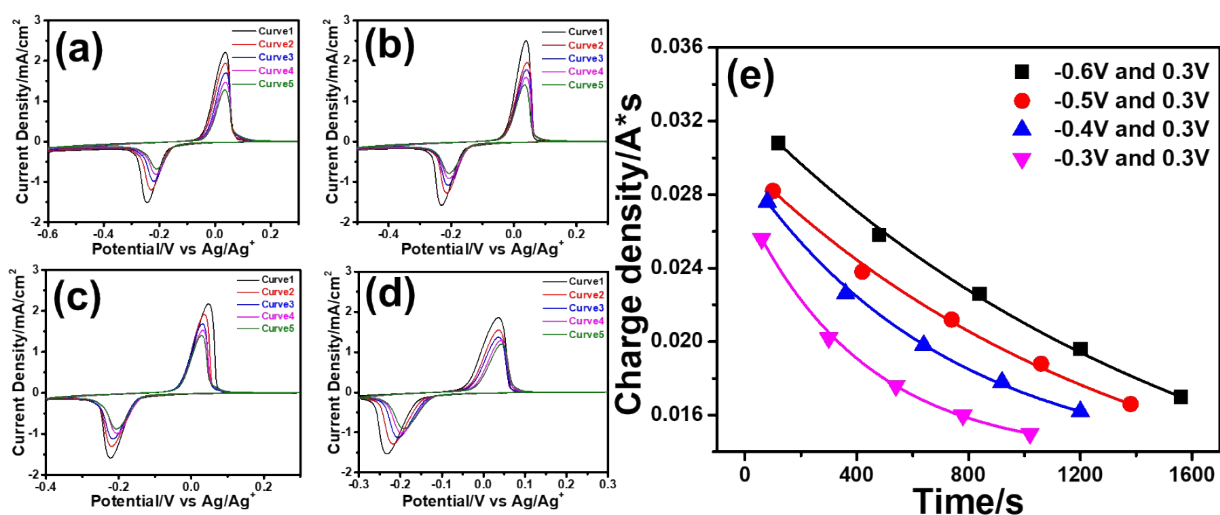

**Fig. S13.** The CV curves of the *m*-LMO-300-F2 electrode in 1.0 M LiClO<sub>4</sub> acetonitrile solution with 5 mV/s scan rate in the potential windows of between *x* and 0.3 V vs Ag/Ag<sup>+</sup>, where *x* is (a) -0.6, (b) -0.5, (c) -0.4, and (d) -0.3 V. (e) The plot of charge capacity (oxidation peak at 0 V) vs time.

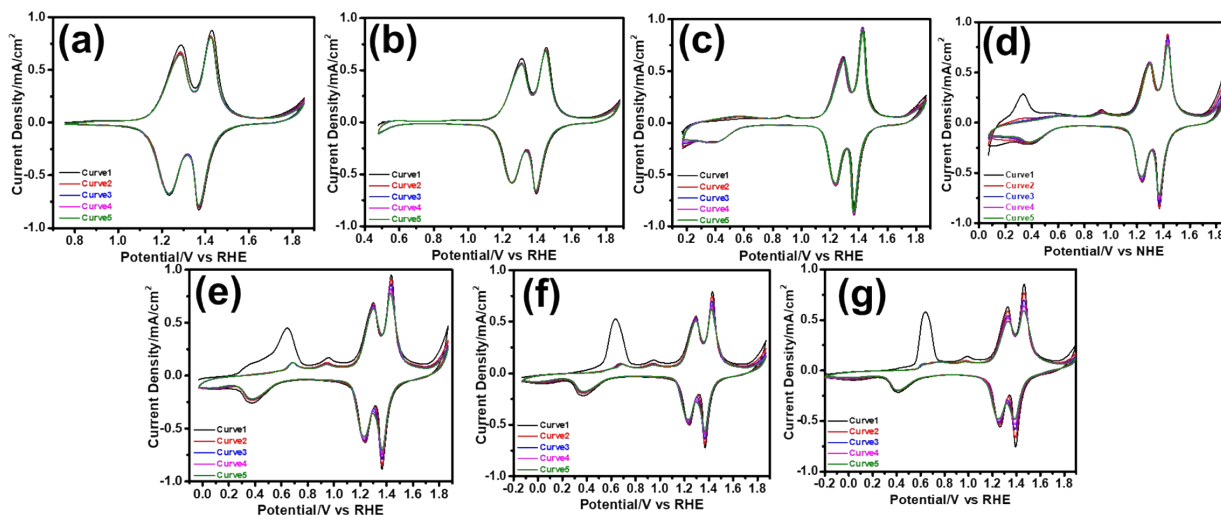

**Fig. S14.** The CV curves of the *m*-LMO-300-F2 electrode in 1.0 M LiNO<sub>3</sub> aqueous solution with 5 mV/s scan rate in potential windows of between *x* and 1.9 V vs RHE, where *x* is (a) 0.75, (b) 0.45, (c) 0.15, (d) 0.05, (e) -0.05, (f) -0.15, and (g) -0.2 V.

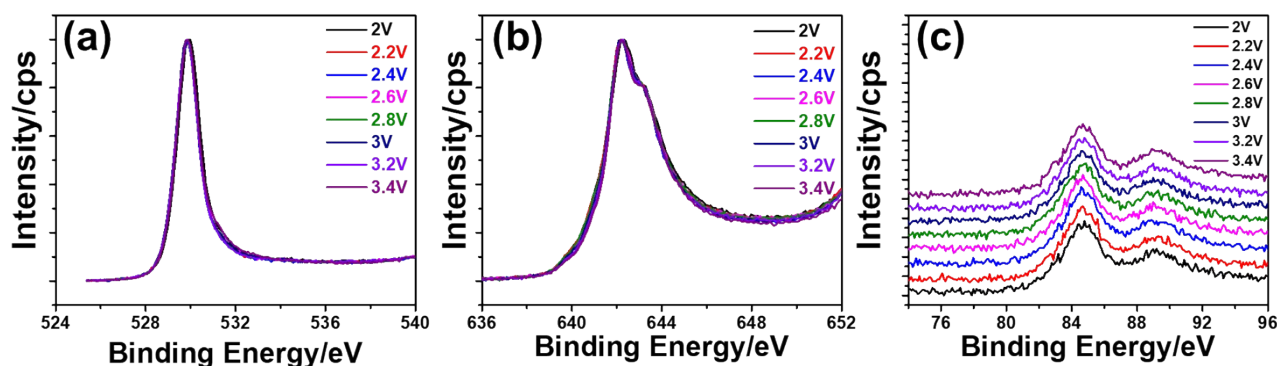

**Fig. S15.** The XPS spectra of the *m*-LMO-300-F2 electrodes, removed at various potentials in 1.0 M LiNO<sub>3</sub>, in the regions of (a) O 1s (b), Mn 2p (<sup>2</sup>P<sub>3/2</sub>), and (c) Mn 3s.



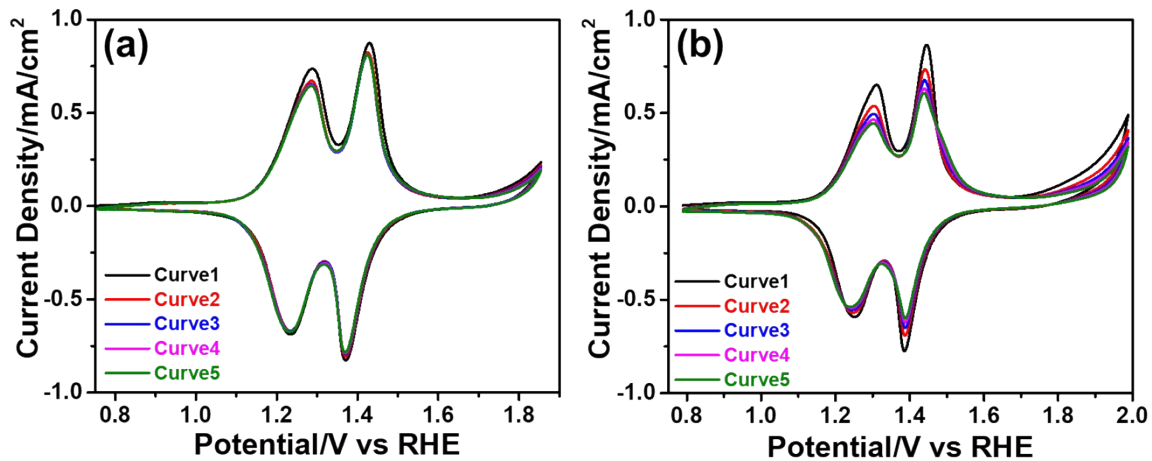

**Fig. S16.** The CV curves of the *m*-LMO-300-F2 electrode in 1.0 M LiNO<sub>3</sub> aqueous solution with 5 mV/s scan rate in the potential windows between 0.75 and xV, where x is (a) 1.9 and (b) 2.0 V.

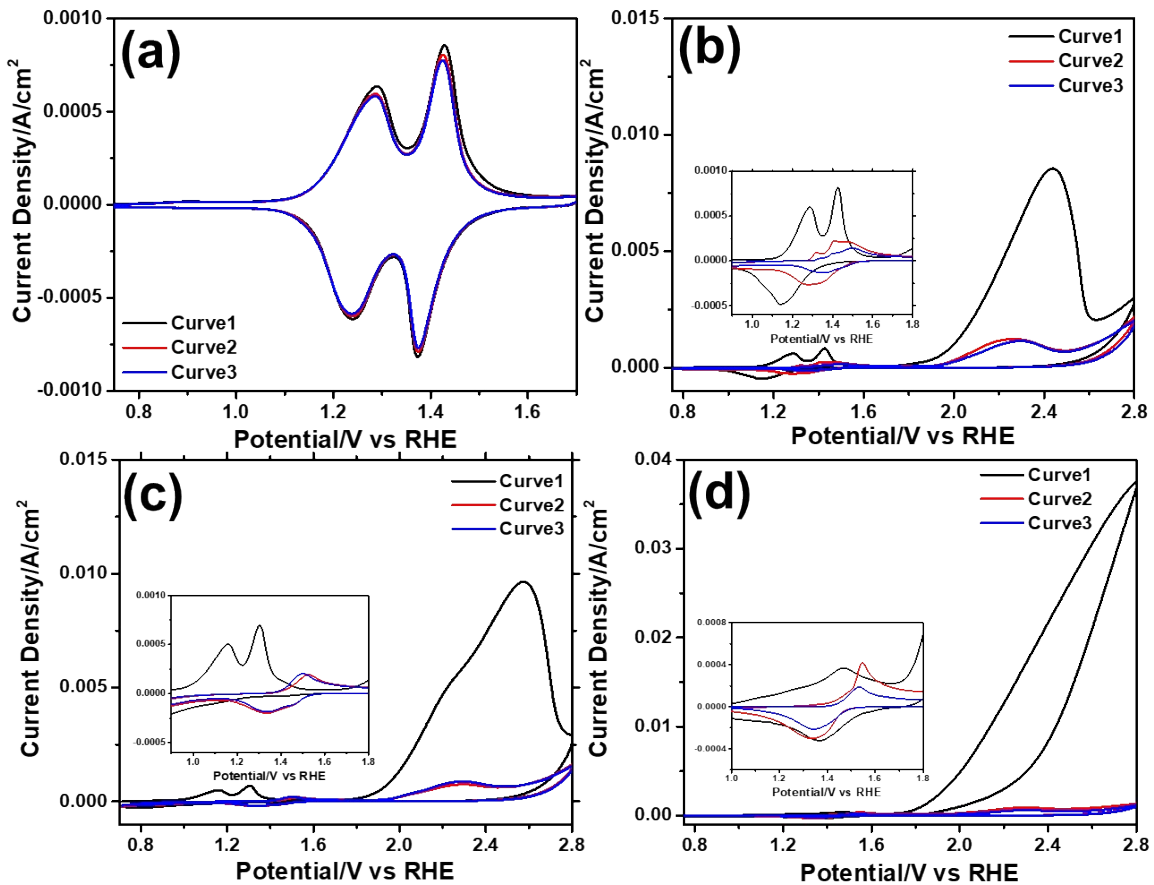

**Fig. S17.** 3 CV curves the *m*-LMO-300-F2 electrode in 1.0 M LiNO<sub>3</sub> aqueous solution with a 5 mV/s scan rate between (a) 0.75 and 1.7 V and (b) between 0.75 and 2.8 V (inset is between 0.9 and 1.8 V), (c) 3 CV curves of the *m*-LMO-300-F2 electrode with 5 mV/s scan rate between 0.75 and 2.8 V (inset is between 0.9 and 1.8 V) in 1.0 M KNO<sub>3</sub> aqueous solution and (d) 3 CV curves of the *m*-Mn<sub>3</sub>O<sub>4</sub>-300-F2 electrode between 0.75 and 2.8 V (inset is between 0.9 and 1.8 V) with 5mV/s scan rate in 1.0 M KNO<sub>3</sub> aqueous solution.

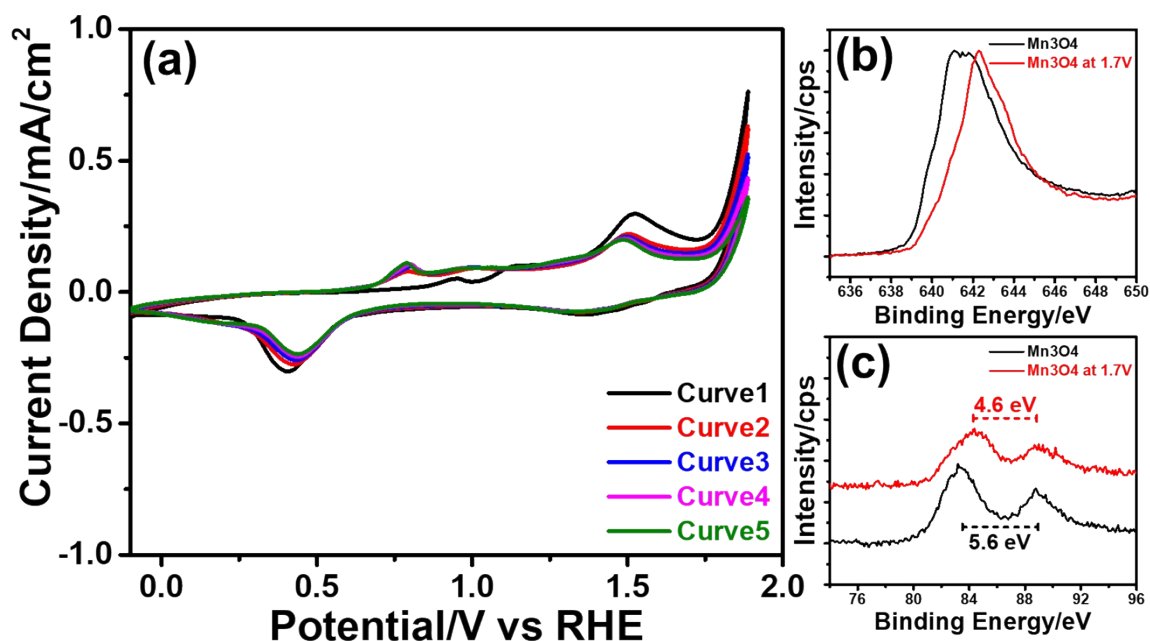

**Fig. S18.** (a) The CV curves of the *m*-Mn<sub>3</sub>O<sub>4</sub>-300-F2 electrode with 5 mV/s scan rate in 1.0 M LiNO<sub>3</sub> aqueous solution. (b) The XPS spectra of Mn 2p and (c) Mn 3s region of the *m*-Mn<sub>3</sub>O<sub>4</sub>-300-F2 electrode before and after LSV in 1.0 M LiNO<sub>3</sub> aqueous solution between -0.1 and 1.9 V.

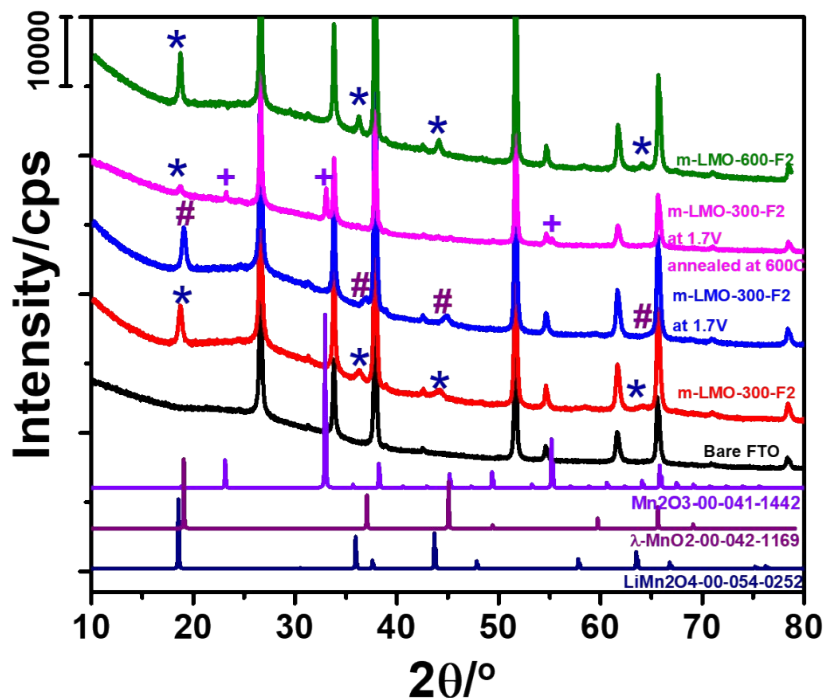

**Fig. S19.** The XRD patterns of the bared FTO, *m*-LMO-300-F2, *m*-LMO-600-F2, and *m*-LMO-300-F2 annealed at 600 °C after LSV between 0.7 and 1.7 V in 1.0 M LiNO<sub>3</sub> aqueous solution and (the XRD patterns of λ-MnO<sub>2</sub>, Mn<sub>2</sub>O<sub>3</sub>, and LiMn<sub>2</sub>O<sub>4</sub> references from ICDD card no. 00-042-1169, 00-041-1442, and 00-054-0252, respectively).

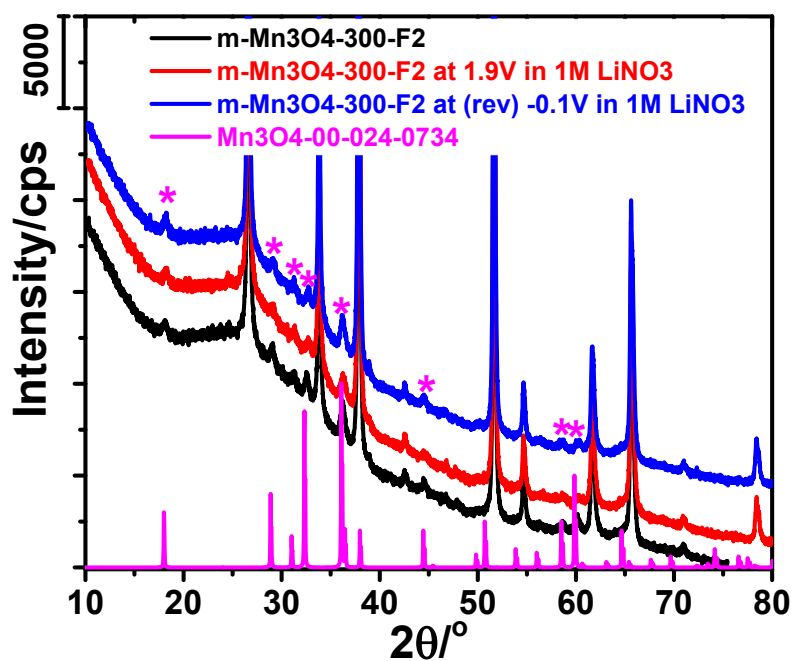

**Fig. S20.** The XRD patterns of the *m*-Mn<sub>3</sub>O<sub>4</sub>-300-F2, before and after LSV between -0.1 and 1.9 V and after full cycle between -0.1 and 1.9 V in 1.0 M LiNO<sub>3</sub> aqueous solution.

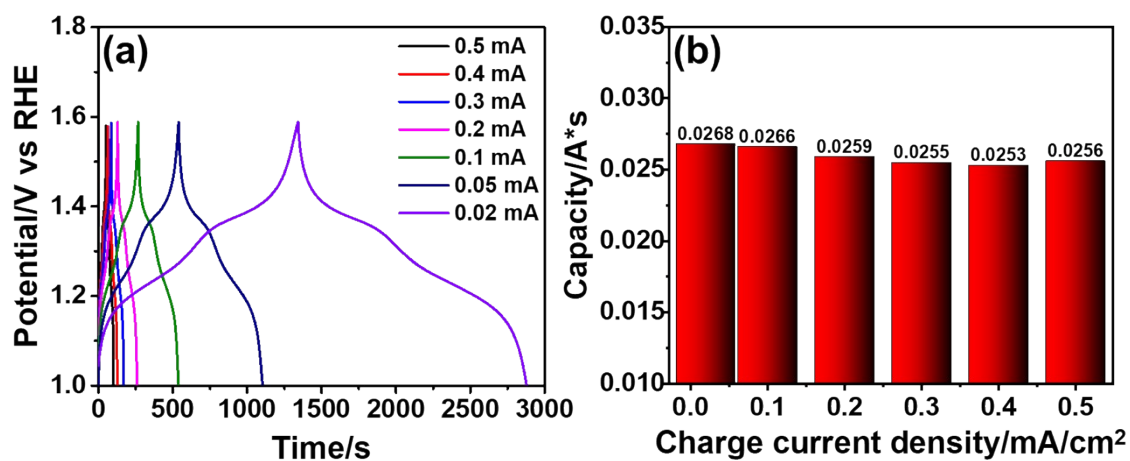

**Fig. S21.** (a) The GCD curves of the *m*-LMO-300-F2 electrode in 1.0 M LiNO<sub>3</sub> at various charge-discharge current densities (indicated in the panel) and (b) charge capacities of the same electrode at various indicated current densities.

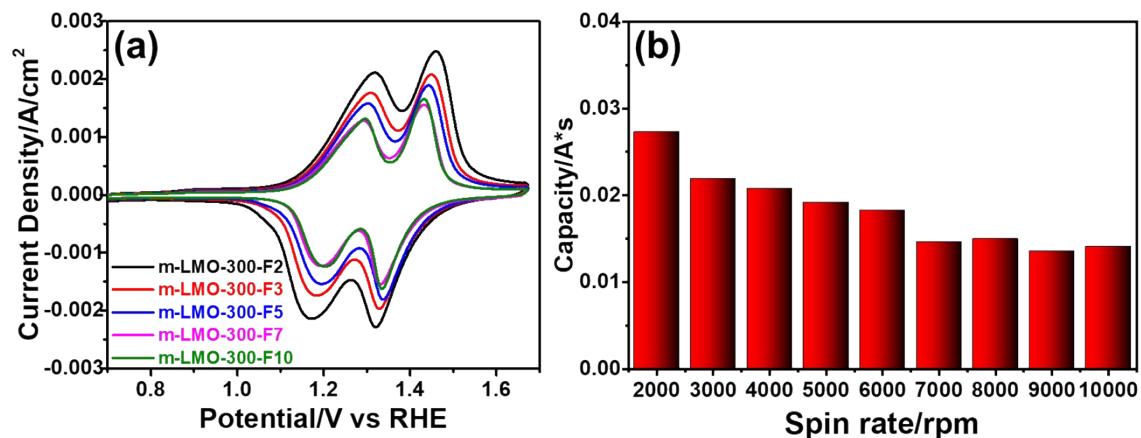

**Fig. S22.** The CV curves of the *m*-LMO-300-F# (# corresponds to spin rate # thousands) in 1.0 M LiNO<sub>3</sub> aqueous solution with a 20 mV/s scan rate and (b) charge capacity vs spin-rate plot of the *m*-LMO-300-F# electrodes.

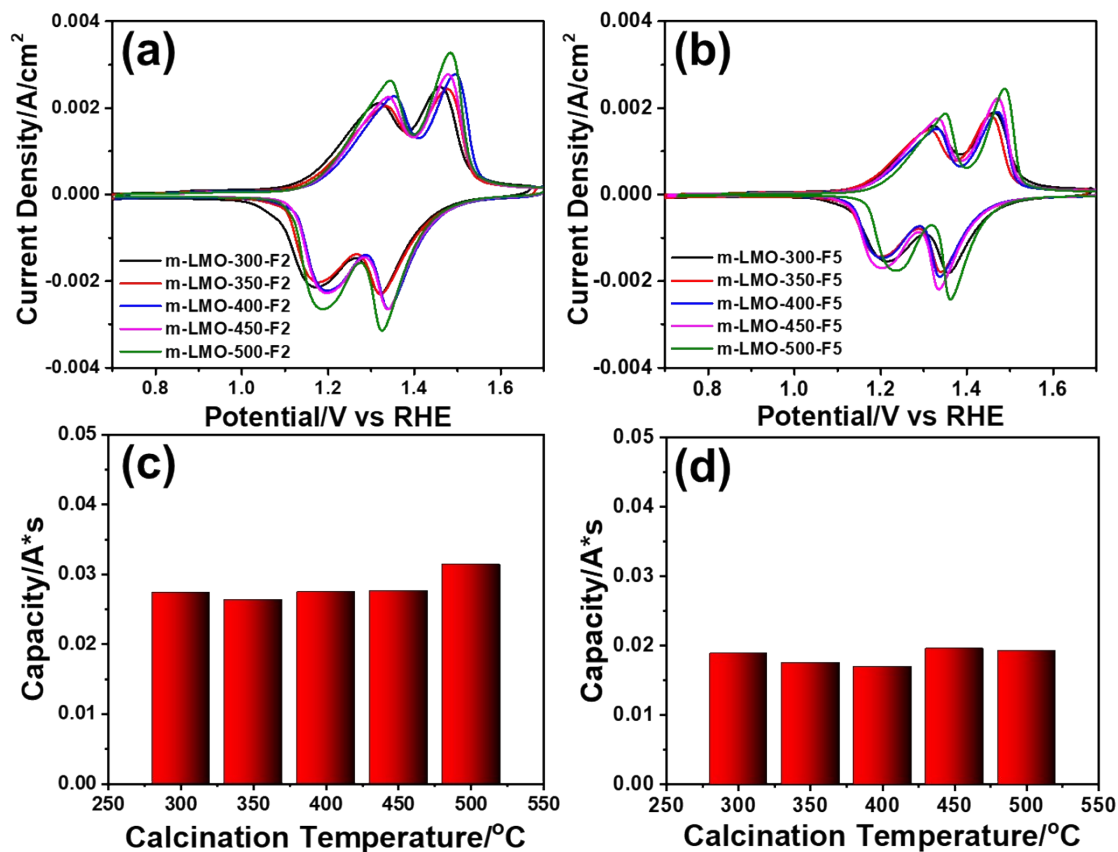

**Fig. S23.** The CV curves of the *m*-LMO-X-F2 (a), *m*-LMO-X-F5 (b), in 1.0 M LiNO<sub>3</sub> aqueous solution with 20 mV/s scan rate, where X is 300, 350, 400, 450, 500. Plot of charge capacity versus calcination/annealing temperature of the (c) *m*-LMO-X-F2, (d) *m*-LMO-X-F5 electrodes.

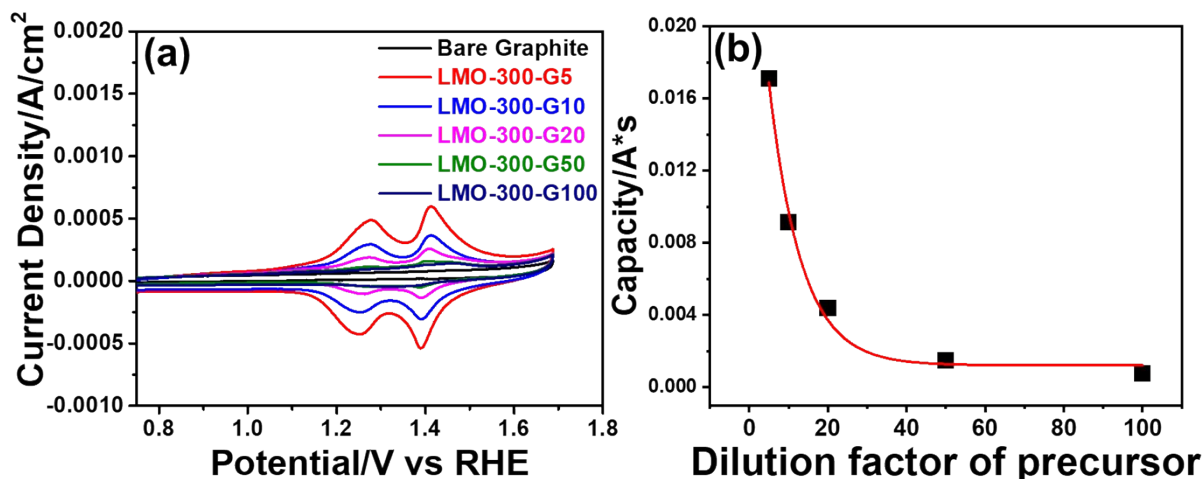

**Fig. S24.** (a) The CV curves of the *m*-LMO-300-G# electrodes in 1.0 M LiNO<sub>3</sub> aqueous solution with 5 mV/s, where # is 5, 10, 20, 50, 100 and (b) the plot of charge capacity versus dilution factor of solution precursor.

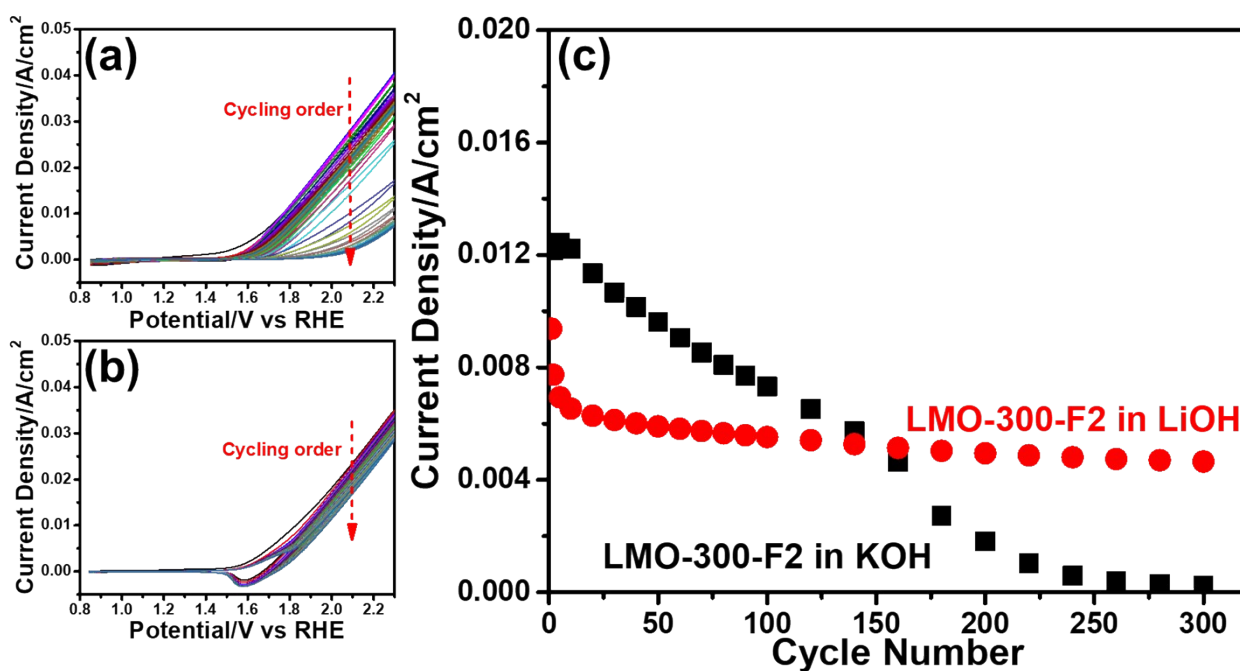

**Fig. S25.** The CV curves of the *m*-LMO-300-F2 electrode a 50 mV/s scan rate in aqueous solutions of (a) 1.0 M KOH and (b) 1.0 M LiOH. (c) The plots of the current density values at 1.8 V versus cycle number of CV curves in the panels (a) and (b).

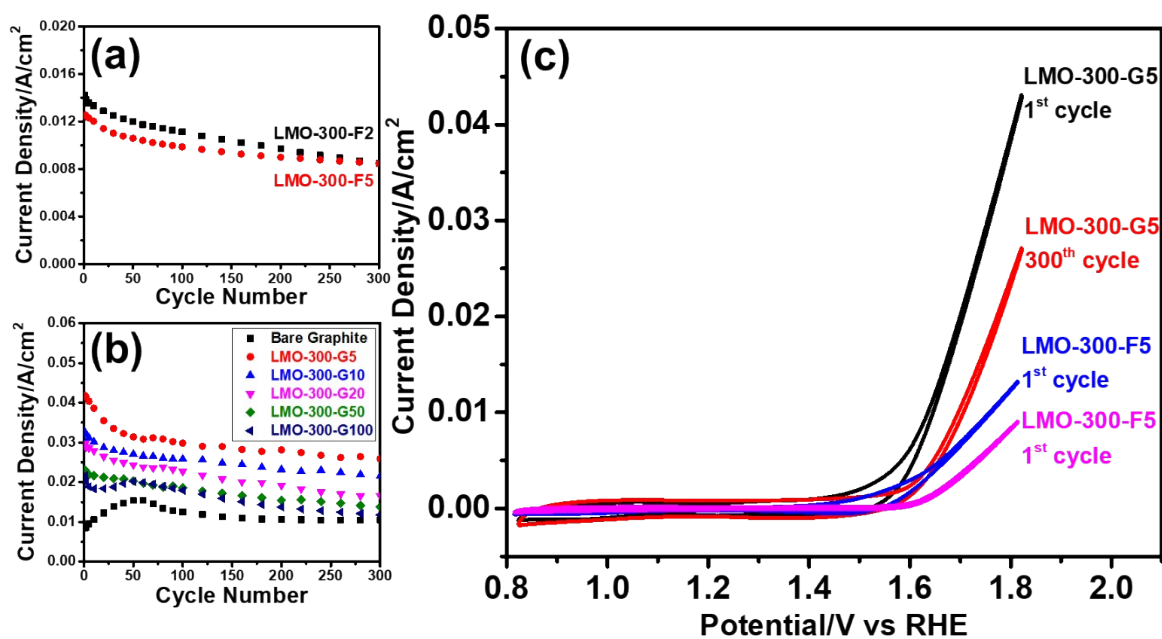

**Fig. S26.** The plots of the current density values at 1.8 V versus CV (50 mV/s scan rate) cycle number in 1.0 M KOH aqueous solution of the (a) *m*-LMO-300-F2 and *m*-LMO-300-F5 electrodes and (b) *m*-LMO-300-G# electrodes, where # is indicated in the labels. (c) The in the first and 300<sup>th</sup> CV cycles with a 50 mV/s scan rate in the same electrolytes of the *m*-LMO-300-G5 and *m*-LMO-300-F5 electrodes.

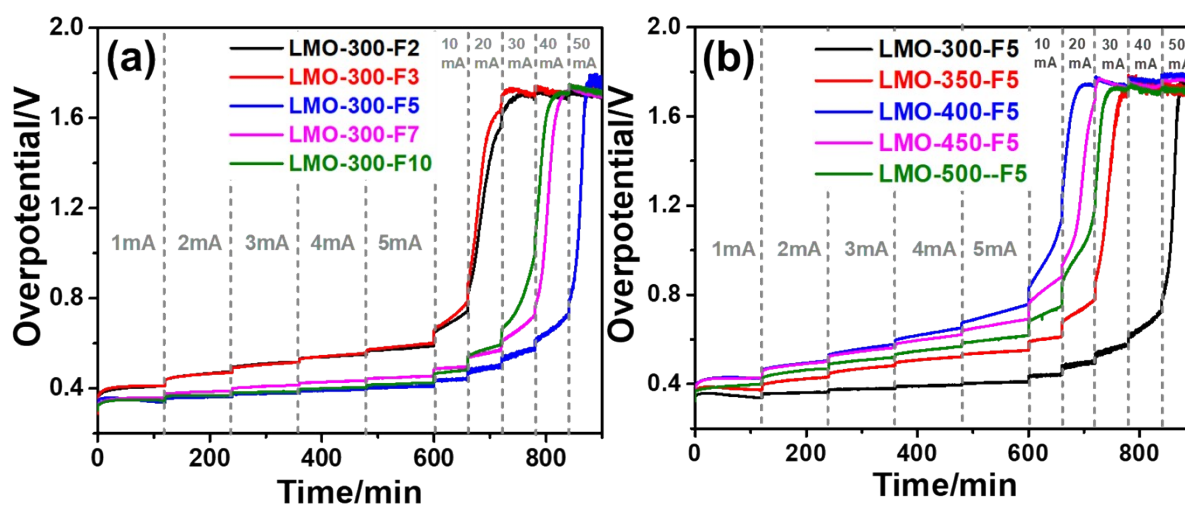

**Fig. S27.** The multi-step chronopotentiometry plots at various current densities (IR-drop corrected) of the (a) *m*-LMO-300-F# electrodes, where # is 2, 3, 5, 7, and 10 and (b) *m*-LMO-X-F5, where X is 300, 350, 400, 450, and 500.



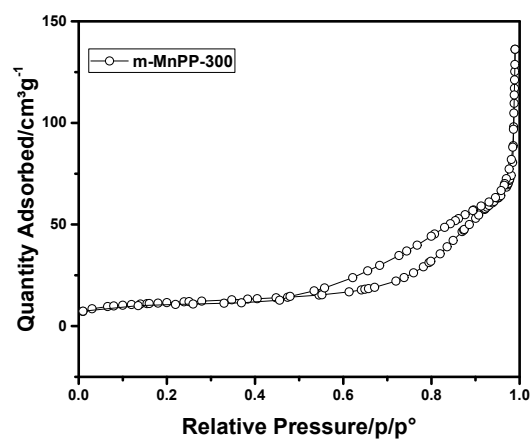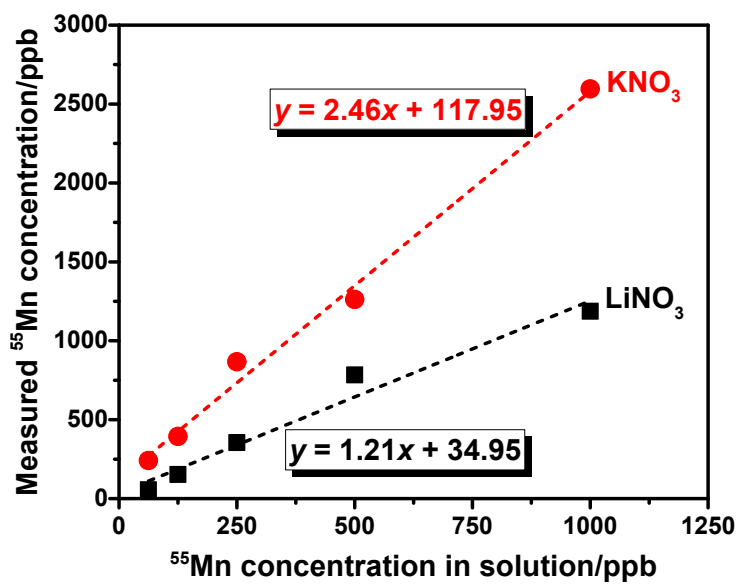

**Fig. S28.** N<sub>2</sub> (77 K) adsorption-desorption isotherm of m-MnPP-300.

**Fig. S29.** ICP-MS calibration curves, recorded in acidified 1M KNO<sub>3</sub> and 1M LiNO<sub>3</sub> solutions.

**Table S1.** The charge capacities and catalytic loads of the *m*-LMO-300-F# electrodes.

| Electrode             | Capacity<br>/A*s | Catalytic load on<br>FTO/ $\mu\text{g}/\text{cm}^2$ |
|-----------------------|------------------|-----------------------------------------------------|
| <i>m</i> -LMO-300-F2  | 0.0273           | 61.1                                                |
| <i>m</i> -LMO-300-F3  | 0.0219           | 49.1                                                |
| <i>m</i> -LMO-300-F4  | 0.0208           | 46.5                                                |
| <i>m</i> -LMO-300-F5  | 0.0192           | 42.9                                                |
| <i>m</i> -LMO-300-F6  | 0.0183           | 40.9                                                |
| <i>m</i> -LMO-300-F7  | 0.0146           | 32.7                                                |
| <i>m</i> -LMO-300-F8  | 0.0150           | 33.5                                                |
| <i>m</i> -LMO-300-F9  | 0.0136           | 30.4                                                |
| <i>m</i> -LMO-300-F10 | 0.0141           | 31.5                                                |

**Table S2.** The charge capacities and catalytic loads of the *m*-LMO-X-F2 and *m*-LMO-X-F5 electrodes, where X is 300, 350, 400, 450, 500.

| Electrode            | Capacity<br>/A*s | Catalytic load on<br>FTO/ $\mu\text{g}/\text{cm}^2$ |
|----------------------|------------------|-----------------------------------------------------|
| <i>m</i> -LMO-300-F2 | 0.0273           | 61.1                                                |
| <i>m</i> -LMO-350-F2 | 0.0264           | 59.1                                                |
| <i>m</i> -LMO-400-F2 | 0.0275           | 61.6                                                |
| <i>m</i> -LMO-450-F2 | 0.0276           | 61.8                                                |
| <i>m</i> -LMO-500-F2 | 0.0214           | 70.3                                                |
| <i>m</i> -LMO-300-F5 | 0.0189           | 42.3                                                |
| <i>m</i> -LMO-350-F5 | 0.0176           | 39.4                                                |
| <i>m</i> -LMO-400-F5 | 0.0170           | 38.1                                                |
| <i>m</i> -LMO-450-F5 | 0.0196           | 43.8                                                |
| <i>m</i> -LMO-500-F5 | 0.0193           | 43.2                                                |

**Table S3.** The charge capacities and catalytic loads of the *m*-LMO-300-G# electrodes, where # is 5, 10, 20, 50, 100.

| Electrode              | Capacity<br>/A*s | Catalytic load on<br>FTO/ $\mu\text{g}/\text{cm}^2$ |
|------------------------|------------------|-----------------------------------------------------|
| <i>m</i> -LMO-300-G5   | 0.0171           | 38.3                                                |
| <i>m</i> -LMO-300-G10  | 0.0092           | 20.6                                                |
| <i>m</i> -LMO-300-G20  | 0.0044           | 9.9                                                 |
| <i>m</i> -LMO-300-G50  | 0.0015           | 3.3                                                 |
| <i>m</i> -LMO-300-G100 | 0.0007           | 1.5                                                 |

### Calatalytic load calculation from CV measurements.

$$\text{oad } (\mu\text{g}/\text{cm}^2) = \frac{q \left( \frac{\text{A} \cdot \text{s}}{\text{cm}^2} \right) \times 180.8 \left( \frac{\text{g}}{\text{mol}} \right) \times 10^6 \left( \frac{\mu\text{g}}{\text{g}} \right) \times 100}{96485 \text{ (C/mol)}} \quad (\text{Equation S1})$$

Where, q is the calculated charge density (A·s·cm<sup>-2</sup>) and 180.8 g·mol<sup>-1</sup> is the molecular mass of LiMn<sub>2</sub>O<sub>4</sub>.

### ICP-MS Calibration Curves

Fig. S29 shows the calibration curves using Mn standard solutions similar to the electrolyte solutions used in this investigation. The calibration curves show that potassium ions (by forming <sup>39</sup>K<sup>16</sup>O<sup>+</sup>) interfere with manganese. Manganese concentrations were determined to be higher than actual values (about 2.46 times higher in KNO<sub>3</sub> and 1.21 time in LiNO<sub>3</sub> solutions). The corrected manganese in KNO<sub>3</sub> and LiNO<sub>3</sub> electrolytes are tabulated in Table S4.

**Table S4.** Corrected Mn concentrations in in KNO<sub>3</sub> and LiNO<sub>3</sub> electrolytes (S1: m-Mn<sub>3</sub>O<sub>4</sub> in KNO<sub>3</sub> 0.75 to 2.8V, S2: m-LMO in KNO<sub>3</sub> 0.75 to 2.8V, S3: m-LMO in LiNO<sub>3</sub> 0.75 to 2.8V, S4: m-LMO in LiNO<sub>3</sub> 0.75 and 1.7V, and S5: m-LMO in LiNO<sub>3</sub> -0.15 and 1.9V).

| Solutions | Experimental ppb | Corrected Mn | Mn Amount (μg) in 20 ml of electrolyte | Degredation % in LiMn <sub>2</sub> O <sub>4</sub> |
|-----------|------------------|--------------|----------------------------------------|---------------------------------------------------|
| <b>S1</b> | 4635             | 1836         | 41.96                                  | -                                                 |
| <b>S2</b> | 2738             | 1065         | 24.34                                  | 65                                                |
| <b>S3</b> | 1163             | 932          | 21.30                                  | 57                                                |
| <b>S4</b> | 76               | 34           | 0.77                                   | 2                                                 |
| <b>S5</b> | 562              | 435          | 9.94                                   | 26                                                |
